# Supplementary material for: Electronic structure and bonding of lanthanoid(iii) carbonates
Source: Royal Society of Chemistry journal article supplement (doi:10.1039/c2cp41996c), 2012-01-01
Supplement: c2cp41996c.pdf [file c2cp41996c.pdf]

## **Electronic Structure and Bonding of Lanthanoid(III) Carbonates.**

**Yannick Jeanvoine,<sup>a</sup> Pere Miró,<sup>b</sup> Fausto Martelli,<sup>a</sup> Christopher J. Cramer<sup>b,\*</sup> and Riccardo Spezia<sup>a,\*</sup>**

*<sup>a</sup>Université d'Evry Val d'Essonne, CNRS UMR 8587 LAMBE, Bd F. Mitterrand, 91025 Evry Cedex, France.*

*<sup>b</sup>Department of Chemistry and Supercomputing Institute, University of Minnesota, 207 Pleasant St. SE, Minneapolis, MN 55455-0431 USA.*

**SUPPORTING INFORMATION**

## Contents

**Figure S1.**  $\text{La}^{3+}\text{-CO}_3^{2-}$  energy curves for various basis set. Basis1 = 6-31+G(d,p); basis 2 = 6-311+G(d,p) ; basis 3 = 6-311++G(3df,2p) ; basis 4 = AUG-cc-pVTZ.

**Table S1.** Distances (in Å) between Ln, oxygen and carbon atoms in optimized geometries. O(1) is/are the oxygen(s) closer to Ln, O(2) the farthest one(s).

**Table S2.** Energy decomposition analysis (EDA) in gas phase of the La-ligand interaction. The metal centre ( $\text{M}^{3+}$ ) was chosen as a fragment and the three/four ligands ( $\{\text{CO}_3^{2-}\}_{3/4}$ ) as the other fragment. Energies in  $\text{kcal}\cdot\text{mol}^{-1}$ . The carbonate coordination motifs are designated as number monodentate (m) or bidentate (b).

**Table S3.** Energy decomposition analysis (EDA) in gas phase of the Lu-ligand interaction. The metal centre ( $\text{M}^{3+}$ ) was chosen as a fragment and the three/four ligands ( $\{\text{CO}_3^{2-}\}_{3/4}$ ) as the other fragment. Energies in  $\text{kcal}\cdot\text{mol}^{-1}$ . The carbonate coordination motifs are designated as number monodentate (m) or bidentate (b).

**Table S4.** Energy decomposition analysis (EDA) in gas phase of the La-ligand interaction. The metal centre with 3 carbonates ( $\{\text{M}(\text{CO}_3^{2-})_2\}^{-1}$ ) was chosen as a fragment and the remaining ligand ( $\text{CO}_3^{2-}$ ) as the other fragment. Energies in  $\text{kcal}\cdot\text{mol}^{-1}$ . The carbonate coordination motifs are designated as number monodentate (m) or bidentate (b).

**Table S5.** Energy decomposition analysis (EDA) in gas phase of the Lu-ligand interaction. The metal centre with 3 carbonates ( $\{\text{M}(\text{CO}_3^{2-})_2\}^{-1}$ ) was chosen as a fragment and the remaining ligand ( $\text{CO}_3^{2-}$ ) as the other fragment. Energies in  $\text{kcal}\cdot\text{mol}^{-1}$ . The carbonate coordination motifs are designated as number monodentate (m) or bidentate (b).

**Table S6.** Natural Orbitals for Chemical Valence in gas phase for in the fragments presented in Table 3 in La species with 3 carbonate ligands. Energy in  $\text{kcal}\cdot\text{mol}^{-1}$  (only energies above  $5\text{kcal}\cdot\text{mol}^{-1}$  are presented). The carbonate coordination motifs are designated as number monodentate (m) or bidentate (b).

**Table S7.** Natural Orbitals for Chemical Valence in gas phase for in the fragments presented in Table 4 in Lu species with 3 carbonate ligands. Energy in  $\text{kcal}\cdot\text{mol}^{-1}$  (only energies above  $5\text{kcal}\cdot\text{mol}^{-1}$  are presented). The carbonate coordination motifs are designated as number monodentate (m) or bidentate (b).

**Table S8.** Topological analysis of the electron density of La species with 3 carbonate ligands. Gas phase calculations.

**Table S9.** Topological analysis of the electron density of La species with 4 carbonate ligands. Gas phase calculations.

**Table S10.** Topological analysis of the electron density of Lu species with 3 carbonate ligands. Gas phase calculations.

**Table S11.** Topological analysis of the electron density of Lu species with 4 carbonate ligands. Gas phase calculations.

**Table S12.** Cartesian coordinates of La species with 3 carbonate ligands.

**Table S13.** Cartesian coordinates of La species with 4 carbonate ligands.

**Table S14.** Cartesian coordinates of Lu species with 3 carbonate ligands.

**Table S15.** Cartesian coordinates of Lu species with 4 carbonate ligands.

**Table S16.** Second-order perturbative estimates of donor-acceptor interactions in the NBO basis between carbonates and Ln(III). We specify the character of the acceptor orbital, while for the donor it always correspond to oxygen lone pair. Only energies above 10 kcal mol<sup>-1</sup> are reported.

**Table S17.** Relative energy obtained with different functionals with B3LYP optimized geometries (fixed) and optimizing the geometry with the given functional. Energies are in kcal/mol.

**Figure S1.**  $\text{La}^{3+}\text{-CO}_3^{2-}$  energy curves for various basis set. Basis1 = 6-31+G(d,p); basis 2 = 6-311+G(d,p) ; basis 3 = 6-311++G(3df,2p) ; basis 4 = AUG-cc-pVTZ.

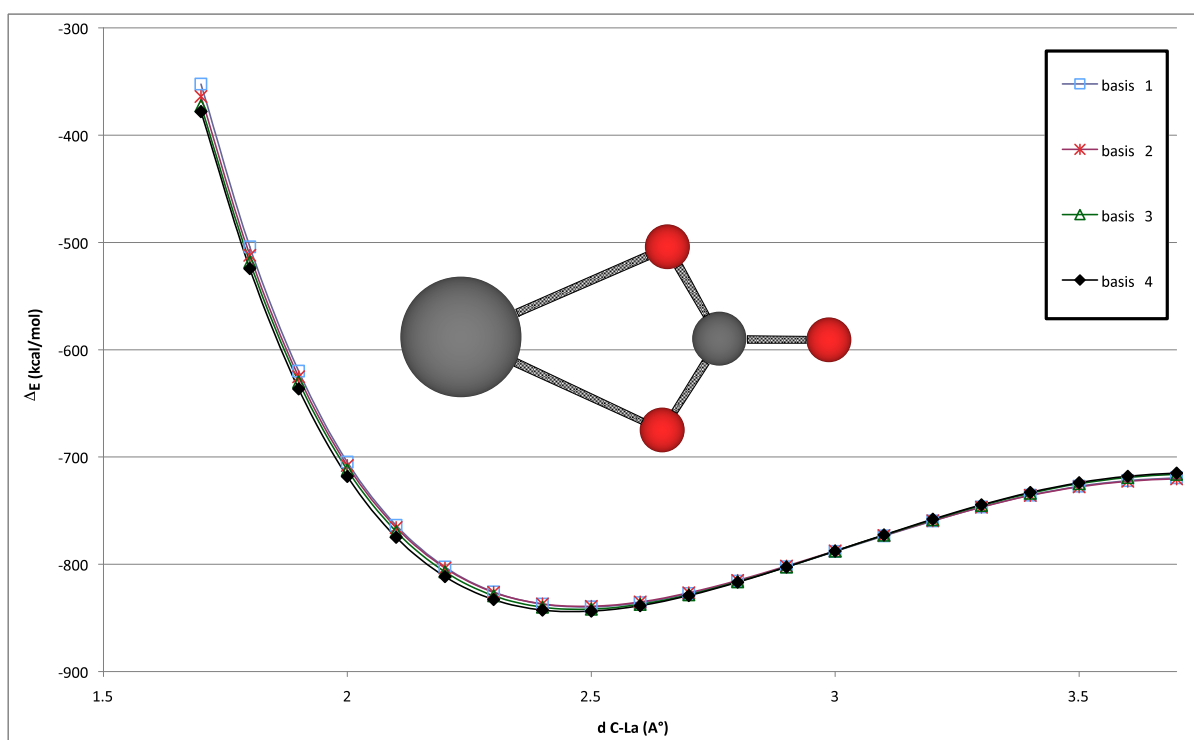

**Table S1.** Distances (in Å) between Ln, oxygen and carbon atoms in optimized geometries. O(1) is/are the oxygen(s) closer to Ln, O(2) the farthest one(s). The carbonate coordination motifs are designated as number monodentate (m) or bidentate (b).

|                        | Ln-O <sup>(1)</sup> | Ln-O <sup>(2)</sup> | Ln-C      |
|------------------------|---------------------|---------------------|-----------|
| <b>LaC<sub>3</sub></b> |                     |                     |           |
| 3m                     | 2.20                | 4.29                | 3.60      |
| 2m1b                   | 2.23/2.41           | 4.33/4.12           | 3.61/2.87 |
| 1m2b                   | 2.44/2.25           | 4.16/4.36           | 2.90/3.62 |
| 3b                     | 2.47                | 4.19                | 2.93      |

|                        |           |           |           |
|------------------------|-----------|-----------|-----------|
| <b>LaC<sub>4</sub></b> |           |           |           |
| 4m                     | 2.34      | 4.49      | 3.7       |
| 3m1b                   | 2.38/2.60 | 4.49/4.30 | 3.72/3.01 |
| 2m2b                   | 2.43/2.55 | 4.53/4.33 | 3.72/3.01 |
| 1m3b                   | 2.59/2.47 | 4.58/4.38 | 3.81/3.09 |
| 4b                     | 2.64      | 4.42      | 3.12      |

|                        |           |           |           |
|------------------------|-----------|-----------|-----------|
| <b>LuC<sub>3</sub></b> |           |           |           |
| 3m                     | 2.02      | 4.13      | 3.41      |
| 2m1b                   | 2.04/2.20 | 4.15/3.89 | 2.64/3.42 |
| 1m2b                   | 2.24/2.06 | 3.94/4.16 | 3.43/2.68 |
| 3b                     | 2.27      | 3.97      | 2.71      |

|                        |           |           |           |
|------------------------|-----------|-----------|-----------|
| <b>LuC<sub>4</sub></b> |           |           |           |
| 4m                     | 2.13      | 4.21      | 3.48      |
| 3m1b                   | 2.18/2.29 | 4.31/4.08 | 3.50/2.80 |
| 2m2b                   | 2.21/2.43 | 4.31/4.10 | 3.54/2.82 |
| 1m3b                   | 2.24/2.49 | 4.35/4.13 | 3.57/2.87 |
| 4b                     | 2.48      | 4.2       | 2.9       |

**Table S2.** Energy decomposition analysis (EDA) in gas phase of the La-ligand interaction. The metal centre ( $M^{3+}$ ) was chosen as a fragment and the three/four ligands ( $\{CO_3^{2-}\}_{3/4}$ ) as the other fragment. Energies in  $\text{kcal}\cdot\text{mol}^{-1}$ . The carbonate coordination motifs are designated as number monodentate (m) or bidentate (b).

| Species | Pauli Repulsion | Orbitalic Interaction |          | Electrostatic Interaction |          |
|---------|-----------------|-----------------------|----------|---------------------------|----------|
| 3m      | 245.64          | -344.33               | (16.01%) | -1806.09                  | (84.99%) |
| 2m1b    | 246.32          | -329.93               | (14.99%) | -1871.09                  | (85.01%) |
| 1m2b    | 241.29          | -314.75               | (14.02%) | -1930.34                  | (85.98%) |
| 3b      | 232.89          | -299.36               | (13.10%) | -1985.49                  | (86.90%) |
| 4m      | 177.67          | -337.96               | (12.48%) | -2168.35                  | (86.52%) |
| 3m1b    | 170.61          | -323.56               | (12.74%) | -2216.42                  | (87.26%) |
| 2m2b    | 163.60          | -309.65               | (12.03%) | -2264.64                  | (87.97%) |
| 1m3b    | 155.16          | -297.99               | (11.43%) | -2308.89                  | (88.57%) |
| 4b      | 145.29          | -286.47               | (10.86%) | -2350.77                  | (89.14%) |

**Table S3.** Energy decomposition analysis (EDA) in gas phase of the Lu-ligand interaction. The metal centre ( $M^{3+}$ ) was chosen as a fragment and the three/four ligands ( $\{CO_3^{2-}\}_{3/4}$ ) as the other fragment. Energies in  $kcal\cdot mol^{-1}$ . The carbonate coordination motifs are designated as number monodentate (m) or bidentate (b).

| <b>Species</b> | <b>Pauli Repulsion</b> | <b>Orbitalic Interaction</b> |          | <b>Electrostatic Interaction</b> |          |
|----------------|------------------------|------------------------------|----------|----------------------------------|----------|
| 3m             | 237.37                 | -384.53                      | (16.88%) | -1892.91                         | (83.12%) |
| 2m1b           | 244.41                 | -377.15                      | (16.07%) | -1969.96                         | (83.93%) |
| 1m2b           | 238.74                 | -365.01                      | (15.21%) | -2034.24                         | (84.79%) |
| 3b             | 229.29                 | -350.53                      | (14.34%) | -2094.31                         | (85.66%) |
| 4m             | 181.19                 | -402.95                      | (15.06%) | -2272.17                         | (84.94%) |
| 3m1b           | 171.83                 | -387.51                      | (14.30%) | -2322.35                         | (85.70%) |
| 2m2b           | 163.95                 | -373.40                      | (13.59%) | -2374.79                         | (86.41%) |
| 1m3b           | 153.19                 | -361.52                      | (13.00%) | -2420.44                         | (87.00%) |
| 4b             | 141.33                 | -348.76                      | (12.40%) | -2464.02                         | (87.60%) |

**Table S4.** Energy decomposition analysis (EDA) in gas phase of the La-ligand interaction. The metal centre with 3 carbonates ( $\{M(\text{CO}_3^{2-})_2\}^{-1}$ ) was chosen as a fragment and the remaining ligand ( $\text{CO}_3^{2-}$ ) as the other fragment. Energies in  $\text{kcal}\cdot\text{mol}^{-1}$ . The carbonate coordination motifs are designated as number monodentate (m) or bidentate (b).

| Species | Ligand | Pauli<br>Repulsion | Orbitalic<br>Interaction | Electrostatic<br>Interaction |
|---------|--------|--------------------|--------------------------|------------------------------|
| 3m      | mo     | 114.53             | -90.10 (47.54%)          | -99.41 (52.46%)              |
| 2m1b    | mo     | 104.40             | -81.04 (50.61%)          | -79.10 (49.39%)              |
| 2m1b    | bi     | 130.23             | -95.94 (42.33%)          | -130.71 (57.67%)             |
| 1m2b    | mo     | 95.05              | -73.77 (55.78%)          | -58.48 (44.22%)              |
| 1m2b    | bi     | 116.49             | -85.67 (45.08%)          | -104.36 (54.92%)             |
| 3b      | bi     | 104.37             | -77.73 (49.80%)          | -78.36 (50.20%)              |



**Table S5.** Energy decomposition analysis (EDA) in gas phase of the Lu-ligand interaction. The metal centre with 3 carbonates ( $\{M(\text{CO}_3^{2-})_2\}^{-1}$ ) was chosen as a fragment and the remaining ligand ( $\text{CO}_3^{2-}$ ) as the other fragment. Energies in  $\text{kcal}\cdot\text{mol}^{-1}$ . The carbonate coordination motifs are designated as number monodentate (m) or bidentate (b).

| Species | Ligand | Pauli<br>Repulsion | Orbitalic<br>Interaction | Electrostatic<br>Interaction |
|---------|--------|--------------------|--------------------------|------------------------------|
| 3m      | m      | 126.26             | -101.25 (46.63%)         | -115.89 (53.37%)             |
| 2m1b    | m      | 106.18             | -79.47 (45.87%)          | -93.79 (54.13%)              |
| 2m1b    | b      | 149.5              | -104.4 (38.83%)          | -164.3 (54.13%)              |
| 1m2b    | m      | 97.14              | -72.11 (50.61%)          | -70.38 (49.39%)              |
| 1m2b    | b      | 125.03             | -87.78 (41.23%)          | -125.13 (58.77%)             |
| 3b      | b      | 111.87             | -78.96 (45.97%)          | -92.80 (54.03%)              |

**Table S6.** Natural Orbitals for Chemical Valence in gas phase for in the fragments presented in Table 3 in La species with 3 carbonate ligands. Energy in kcal·mol<sup>-1</sup> (only energies above 5kcal·mol<sup>-1</sup> are presented). The carbonate coordination motifs are designated as number monodentate (m) or bidentate (b). Energies are highly dependent on the fragment choice.

| Species | Ligand |                 | Orbitals |   |                    | Energy    |
|---------|--------|-----------------|----------|---|--------------------|-----------|
| 3m      | m      | 1 <sup>st</sup> | O-2p     | → | La-5d <sup>0</sup> | -24.29959 |
|         |        | 2 <sup>nd</sup> | O-2p     | → | La-5d <sup>0</sup> | -31.35437 |
|         |        | 3 <sup>rd</sup> | O-2p     | → | La-5d <sup>0</sup> | -15.06170 |
| 2m1b    | m      | 1 <sup>st</sup> | O-2p     | → | La-5d <sup>0</sup> | -20.31610 |
|         |        | 2 <sup>nd</sup> | O-2p     | → | La-5d <sup>0</sup> | -29.32818 |
|         |        | 3 <sup>rd</sup> | O-2p     | → | La-5d <sup>0</sup> | -13.83859 |
| 2m1b    | b      | 1 <sup>st</sup> | O-2p     | → | La-5d <sup>0</sup> | -35.16901 |
|         |        | 2 <sup>nd</sup> | O-2p     | → | La-5d <sup>0</sup> | -21.51368 |
|         |        | 3 <sup>rd</sup> | O-2p     | → | La-5d <sup>0</sup> | -8.31394  |
| 1m2b    | m      | 1 <sup>st</sup> | O-2p     | → | La-5d <sup>0</sup> | -27.11360 |
|         |        | 2 <sup>nd</sup> | O-2p     | → | La-5d <sup>0</sup> | -17.50859 |
|         |        | 3 <sup>rd</sup> | O-2p     | → | La-5d <sup>0</sup> | -12.70027 |
| 1m2b    | b      | 1 <sup>st</sup> | O-2p     | → | La-5d <sup>0</sup> | -30.21364 |
|         |        | 2 <sup>nd</sup> | O-2p     | → | La-5d <sup>0</sup> | -20.60048 |
|         |        | 3 <sup>rd</sup> | O-2p     | → | La-5d <sup>0</sup> | -7.30717  |
| 3b      | b      | 1 <sup>st</sup> | O-2p     | → | La-5d <sup>0</sup> | -26.75174 |
|         |        | 2 <sup>nd</sup> | O-2p     | → | La-5d <sup>0</sup> | -19.45519 |
|         |        | 3 <sup>rd</sup> | O-2p     | → | La-5d <sup>0</sup> | -6.47782  |

**Table S7.** Natural Orbitals for Chemical Valence in gas phase for in the fragments presented in Table 4 in Lu species with 3 carbonate ligands. Energy in kcal·mol<sup>-1</sup> (only energies above 5kcal·mol<sup>-1</sup> are presented). The carbonate coordination motifs are designated as number monodentate (m) or bidentate (b). Energies are highly dependent on the fragment choice.

| Species | Ligand |                 | Orbitals |   |                    | Energy     |
|---------|--------|-----------------|----------|---|--------------------|------------|
| 3m      | m      | 1 <sup>st</sup> | O-2p     | → | Lu-6s              | -14.62685* |
|         |        | 2 <sup>nd</sup> | O-2p     | → | Lu-5d <sup>0</sup> | -21.20628  |
|         |        | 3 <sup>rd</sup> | O-2p     | → | Lu-5d <sup>0</sup> | -18.35011  |
|         |        | 4 <sup>th</sup> | O-2p     | → | Lu-5d <sup>0</sup> | -13.93904  |
| 2m1b    | m      | 1 <sup>st</sup> | O-2p     | → | Lu-5d <sup>0</sup> | -17.35802  |
|         |        | 2 <sup>nd</sup> | O-2p     | → | Lu-5d <sup>0</sup> | -22.82156  |
|         |        | 3 <sup>rd</sup> | O-2p     | → | Lu-5d <sup>0</sup> | -14.95281  |
| 2m1b    | b      | 1 <sup>st</sup> | O-2p     | → | Lu-5d <sup>0</sup> | -17.24372  |
|         |        | 2 <sup>nd</sup> | O-2p     | → | Lu-5d <sup>0</sup> | -22.93462  |
|         |        | 3 <sup>rd</sup> | O-2p     | → | Lu-5d <sup>0</sup> | -14.96220  |
| 1m2b    | m      | 1 <sup>st</sup> | O-2p     | → | Lu-5d <sup>0</sup> | -14.70391  |
|         |        | 2 <sup>nd</sup> | O-2p     | → | Lu-5d <sup>0</sup> | -21.94559  |
|         |        | 3 <sup>rd</sup> | O-2p     | → | Lu-5d <sup>0</sup> | -12.28322  |
| 1m2b    | b      | 1 <sup>st</sup> | O-2p     | → | Lu-5d <sup>0</sup> | -25.80296  |
|         |        | 2 <sup>nd</sup> | O-2p     | → | Lu-5d <sup>0</sup> | -20.22867  |
|         |        | 3 <sup>rd</sup> | O-2p     | → | Lu-5d <sup>0</sup> | -7.07274   |
| 3b      | b      | 1 <sup>st</sup> | O-2p     | → | Lu-5d <sup>0</sup> | -23.02938  |
|         |        | 2 <sup>nd</sup> | O-2p     | → | Lu-5d <sup>0</sup> | -17.82575  |
|         |        | 3 <sup>rd</sup> | O-2p     | → | Lu-5d <sup>0</sup> | -6.38278   |

\* Inside fragment 1 with really small contribution of fragment 2.

**Table S8.** Topological analysis of the electron density of La species with 3 carbonate ligands. Gas phase calculations.

| LaCar3 0bi3mo |                                      |          |                  |        |              |        |         |         |
|---------------|--------------------------------------|----------|------------------|--------|--------------|--------|---------|---------|
|               | Type                                 | $\rho_b$ | $\nabla^2\rho_b$ | $G_b$  | $G_b/\rho_b$ | $V_b$  | $E_b^e$ |         |
|               | La-O <sub>carb</sub>                 | (3,-1)   | 0.0838           | 0.4091 | 0.1024       | 1.2224 | -0.1025 | -0.0001 |
|               | La-O <sub>carb</sub>                 | (3,-1)   | 0.0839           | 0.4090 | 0.1026       | 1.2235 | -0.1030 | -0.0003 |
|               | La-O <sub>carb</sub>                 | (3,-1)   | 0.0837           | 0.3987 | 0.1023       | 1.2219 | -0.1049 | -0.0026 |
| LaCar3 1bi2mo |                                      |          |                  |        |              |        |         |         |
|               | Type                                 | $\rho_b$ | $\nabla^2\rho_b$ | $G_b$  | $G_b/\rho_b$ | $V_b$  | $E_b^e$ |         |
|               | La-O <sub>carb</sub>                 | (3,-1)   | 0.0794           | 0.3887 | 0.0964       | 1.2148 | -0.0957 | 0.0008  |
|               | La-O <sub>carb</sub>                 | (3,-1)   | 0.0794           | 0.3887 | 0.0964       | 1.2148 | -0.0957 | 0.0008  |
|               | La-O <sub>carb</sub> '               | (3,-1)   | 0.0620           | 0.2395 | 0.0586       | 0.9453 | -0.0574 | 0.0012  |
|               | La-O <sub>carb</sub> '               | (3,-1)   | 0.0620           | 0.2395 | 0.0586       | 0.9453 | -0.0574 | 0.0012  |
|               | La-(O <sub>carb</sub> ) <sub>2</sub> | (3,+1)   | 0.0343           | 0.1844 | 0.0427       | 1.2460 | -0.0393 | 0.0034  |
| LaCar3 2bi1mo |                                      |          |                  |        |              |        |         |         |
|               | Type                                 | $\rho_b$ | $\nabla^2\rho_b$ | $G_b$  | $G_b/\rho_b$ | $V_b$  | $E_b^e$ |         |
|               | La-O <sub>carb</sub>                 | (3,-1)   | 0.0755           | 0.3710 | 0.0911       | 1.2066 | -0.0895 | 0.0016  |
|               | La-O <sub>carb</sub> '               | (3,-1)   | 0.0579           | 0.2267 | 0.0541       | 0.9344 | -0.0515 | 0.0026  |
|               | La-O <sub>carb</sub> '               | (3,-1)   | 0.0577           | 0.2264 | 0.0540       | 0.9359 | -0.0514 | 0.0026  |
|               | La-O <sub>carb</sub> '               | (3,-1)   | 0.0579           | 0.2269 | 0.0541       | 0.9344 | -0.0515 | 0.0026  |
|               | La-O <sub>carb</sub> '               | (3,-1)   | 0.0579           | 0.2268 | 0.0541       | 0.9344 | -0.0515 | 0.0026  |
|               | La-(O <sub>carb</sub> ) <sub>2</sub> | (3,+1)   | 0.0326           | 0.1753 | 0.0398       | 1.2209 | -0.0358 | 0.0040  |
|               | La-(O <sub>carb</sub> ) <sub>2</sub> | (3,+1)   | 0.0327           | 0.1756 | 0.0399       | 1.2202 | -0.0359 | 0.0040  |
| LaCar3 3bi0mo |                                      |          |                  |        |              |        |         |         |
|               | Type                                 | $\rho_b$ | $\nabla^2\rho_b$ | $G_b$  | $G_b/\rho_b$ | $V_b$  | $E_b^e$ |         |
|               | La-O <sub>carb</sub> '               | (3,-1)   | 0.0542           | 0.2121 | 0.0501       | 0.9243 | -0.0472 | 0.0029  |
|               | La-O <sub>carb</sub> '               | (3,-1)   | 0.0542           | 0.2120 | 0.0501       | 0.9243 | -0.0472 | 0.0029  |
|               | La-O <sub>carb</sub> '               | (3,-1)   | 0.0541           | 0.2131 | 0.0500       | 0.9242 | -0.0467 | 0.0033  |
|               | La-O <sub>carb</sub> '               | (3,-1)   | 0.0543           | 0.2139 | 0.0502       | 0.9245 | -0.0470 | 0.0033  |
|               | La-O <sub>carb</sub> '               | (3,-1)   | 0.0542           | 0.2134 | 0.0501       | 0.9243 | -0.0468 | 0.0033  |
|               | La-O <sub>carb</sub> '               | (3,-1)   | 0.0542           | 0.2135 | 0.0501       | 0.9245 | -0.0468 | 0.0033  |
|               | La-(O <sub>carb</sub> ) <sub>2</sub> | (3,+1)   | 0.0312           | 0.1633 | 0.0373       | 1.1946 | -0.0337 | 0.0035  |
|               | La-(O <sub>carb</sub> ) <sub>2</sub> | (3,+1)   | 0.0312           | 0.1643 | 0.0374       | 1.1984 | -0.0335 | 0.0039  |
|               | La-(O <sub>carb</sub> ) <sub>2</sub> | (3,+1)   | 0.0312           | 0.1653 | 0.0373       | 1.1949 | -0.0332 | 0.0041  |

**Table S9.** Topological analysis of the electron density of La species with 4 carbonate ligands. Gas phase calculations.

| LaCar4_0bi4mo |                                      |          |                  |        |              |        |         |         |
|---------------|--------------------------------------|----------|------------------|--------|--------------|--------|---------|---------|
|               | Type                                 | $\rho_b$ | $\nabla^2\rho_b$ | $G_b$  | $G_b/\rho_b$ | $V_b$  | $E^e_b$ |         |
|               | La-O <sub>carb</sub>                 | (3,-1)   | 0.0603           | 0.3058 | 0.0699       | 1.1588 | -0.0633 | 0.0066  |
|               | La-O <sub>carb</sub>                 | (3,-1)   | 0.0602           | 0.3056 | 0.0698       | 1.1595 | -0.0632 | 0.0066  |
|               | La-O <sub>carb</sub>                 | (3,-1)   | 0.0603           | 0.3058 | 0.0699       | 1.1585 | -0.0633 | 0.0066  |
|               | La-O <sub>carb</sub>                 | (3,-1)   | 0.0604           | 0.3061 | 0.0699       | 1.1585 | -0.0634 | 0.0066  |
| LaCar4_1bi3mo |                                      |          |                  |        |              |        |         |         |
|               | Type                                 | $\rho_b$ | $\nabla^2\rho_b$ | $G_b$  | $G_b/\rho_b$ | $V_b$  | $E^e_b$ |         |
|               | La-O <sub>carb</sub>                 | (3,-1)   | 0.0546           | 0.2746 | 0.0621       | 1.1378 | -0.0555 | 0.0066  |
|               | La-O <sub>carb</sub>                 | (3,-1)   | 0.0560           | 0.2843 | 0.0639       | 1.1411 | -0.0567 | 0.0072  |
|               | La-O <sub>carb</sub>                 | (3,-1)   | 0.0560           | 0.2843 | 0.0639       | 1.1411 | -0.0567 | 0.0072  |
|               | La-O <sub>carb</sub>                 | (3,-1)   | 0.0493           | 0.1599 | 0.0443       | 0.8995 | -0.0487 | -0.0043 |
|               | La-O <sub>carb</sub>                 | (3,-1)   | 0.0405           | 0.1601 | 0.0357       | 0.8809 | -0.0313 | 0.0044  |
|               | La-(O <sub>carb</sub> ) <sub>2</sub> | (3,+1)   | 0.0272           | 0.1349 | 0.0306       | 1.1215 | -0.0274 | 0.0032  |
| LaCar4_2bi2mo |                                      |          |                  |        |              |        |         |         |
|               | Type                                 | $\rho_b$ | $\nabla^2\rho_b$ | $G_b$  | $G_b/\rho_b$ | $V_b$  | $E^e_b$ |         |
|               | La-O <sub>carb</sub>                 | (3,-1)   | 0.0499           | 0.2527 | 0.0557       | 1.1182 | -0.0483 | 0.0074  |
|               | La-O <sub>carb</sub>                 | (3,-1)   | 0.0499           | 0.2527 | 0.0557       | 1.1182 | -0.0483 | 0.0074  |
|               | La-O <sub>carb</sub>                 | (3,-1)   | 0.0458           | 0.1783 | 0.0406       | 0.8858 | -0.0366 | 0.0040  |
|               | La-O <sub>carb</sub>                 | (3,-1)   | 0.0386           | 0.1528 | 0.0336       | 0.8713 | -0.0290 | 0.0046  |
|               | La-O <sub>carb</sub>                 | (3,-1)   | 0.0458           | 0.1783 | 0.0406       | 0.8858 | -0.0366 | 0.0040  |
|               | La-O <sub>carb</sub>                 | (3,-1)   | 0.0386           | 0.1528 | 0.0336       | 0.8713 | -0.0290 | 0.0046  |
|               | La-(O <sub>carb</sub> ) <sub>2</sub> | (3,+1)   | 0.0259           | 0.1328 | 0.0286       | 1.1042 | -0.0240 | 0.0046  |
|               | La-(O <sub>carb</sub> ) <sub>2</sub> | (3,+1)   | 0.0259           | 0.1328 | 0.0286       | 1.1042 | -0.0240 | 0.0046  |
| LaCar4_3bi1mo |                                      |          |                  |        |              |        |         |         |
|               | Type                                 | $\rho_b$ | $\nabla^2\rho_b$ | $G_b$  | $G_b/\rho_b$ | $V_b$  | $E^e_b$ |         |
|               | La-O <sub>carb</sub>                 | (3,-1)   | 0.0339           | 0.1325 | 0.0289       | 0.8514 | -0.0246 | 0.0043  |
|               | La-O <sub>carb</sub>                 | (3,-1)   | 0.0420           | 0.1619 | 0.0366       | 0.8696 | -0.0326 | 0.0039  |
|               | La-O <sub>carb</sub>                 | (3,-1)   | 0.0379           | 0.1490 | 0.0328       | 0.8658 | -0.0284 | 0.0044  |
|               | La-O <sub>carb</sub>                 | (3,-1)   | 0.0416           | 0.1522 | 0.0363       | 0.8706 | -0.0345 | 0.0018  |
|               | La-O <sub>carb</sub>                 | (3,-1)   | 0.0420           | 0.1619 | 0.0366       | 0.8698 | -0.0326 | 0.0039  |
|               | La-O <sub>carb</sub>                 | (3,-1)   | 0.0340           | 0.1329 | 0.0290       | 0.8516 | -0.0247 | 0.0043  |
|               | La-O <sub>carb</sub>                 | (3,-1)   | 0.0447           | 0.2264 | 0.0490       | 1.0968 | -0.0413 | 0.0076  |
|               | La-(O <sub>carb</sub> ) <sub>2</sub> | (3,+1)   | 0.0238           | 0.1173 | 0.0256       | 1.0726 | -0.0218 | 0.0038  |
|               | La-(O <sub>carb</sub> ) <sub>2</sub> | (3,+1)   | 0.0248           | 0.1239 | 0.0270       | 1.0908 | -0.0231 | 0.0039  |
|               | La-(O <sub>carb</sub> ) <sub>2</sub> | (3,+1)   | 0.0239           | 0.1175 | 0.0256       | 1.0733 | -0.0218 | 0.0038  |

| LaCar4 4bi0mo                        |        |          |                  |        |              |         |         |
|--------------------------------------|--------|----------|------------------|--------|--------------|---------|---------|
|                                      | Type   | $\rho_b$ | $\nabla^2\rho_b$ | $G_b$  | $G_b/\rho_b$ | $V_b$   | $E_b^e$ |
| La-O <sub>carb</sub>                 | (3,-1) | 0.0327   | 0.1284           | 0.0276 | 0.8435       | -0.0230 | 0.0046  |
| La-O <sub>carb</sub>                 | (3,-1) | 0.0372   | 0.1438           | 0.0317 | 0.8518       | -0.0274 | 0.0043  |
| La-O <sub>carb</sub>                 | (3,-1) | 0.0327   | 0.1288           | 0.0276 | 0.8433       | -0.0229 | 0.0047  |
| La-O <sub>carb</sub>                 | (3,-1) | 0.0371   | 0.1436           | 0.0316 | 0.8516       | -0.0274 | 0.0043  |
| La-O <sub>carb</sub>                 | (3,-1) | 0.0371   | 0.1436           | 0.0316 | 0.8519       | -0.0274 | 0.0043  |
| La-O <sub>carb</sub>                 | (3,-1) | 0.0327   | 0.1291           | 0.0276 | 0.8436       | -0.0230 | 0.0047  |
| La-O <sub>carb</sub>                 | (3,-1) | 0.0327   | 0.1285           | 0.0276 | 0.8434       | -0.0230 | 0.0046  |
| La-O <sub>carb</sub>                 | (3,-1) | 0.0372   | 0.1437           | 0.0317 | 0.8518       | -0.0274 | 0.0043  |
| La-(O <sub>carb</sub> ) <sub>2</sub> | (3,+1) | 0.0224   | 0.1096           | 0.0236 | 1.0508       | -0.0197 | 0.0038  |
| La-(O <sub>carb</sub> ) <sub>2</sub> | (3,+1) | 0.0224   | 0.1096           | 0.0236 | 1.0508       | -0.0197 | 0.0039  |
| La-(O <sub>carb</sub> ) <sub>2</sub> | (3,+1) | 0.0224   | 0.1098           | 0.0236 | 1.0512       | -0.0197 | 0.0039  |
| La-(O <sub>carb</sub> ) <sub>2</sub> | (3,+1) | 0.0224   | 0.1096           | 0.0236 | 1.0513       | -0.0198 | 0.0038  |

**Table S10.** Topological analysis of the electron density of Lu species with 3 carbonate ligands. Gas phase calculations.

| LuCar3_0bi3mo |                                      |          |                  |        |              |        |         |         |
|---------------|--------------------------------------|----------|------------------|--------|--------------|--------|---------|---------|
|               | Type                                 | $\rho_b$ | $\nabla^2\rho_b$ | $G_b$  | $G_b/\rho_b$ | $V_b$  | $E^e_b$ |         |
|               | Lu-O <sub>carb</sub>                 | (3,-1)   | 0.1011           | 0.6453 | 0.1613       | 1.5955 | -0.1613 | 0.0000  |
|               | Lu-O <sub>carb</sub>                 | (3,-1)   | 0.1012           | 0.6438 | 0.1614       | 1.5949 | -0.1619 | -0.0005 |
|               | Lu-O <sub>carb</sub>                 | (3,-1)   | 0.1012           | 0.6394 | 0.1614       | 1.5949 | -0.1630 | -0.0016 |
| LuCar3_1bi2mo |                                      |          |                  |        |              |        |         |         |
|               | Type                                 | $\rho_b$ | $\nabla^2\rho_b$ | $G_b$  | $G_b/\rho_b$ | $V_b$  | $E^e_b$ |         |
|               | Lu-O <sub>carb</sub>                 | (3,-1)   | 0.0957           | 0.6069 | 0.1505       | 1.5720 | -0.1493 | 0.0012  |
|               | Lu-O <sub>carb</sub>                 | (3,-1)   | 0.0958           | 0.6069 | 0.1506       | 1.5725 | -0.1495 | 0.0011  |
|               | Lu-O <sub>carb</sub>                 | (3,-1)   | 0.0754           | 0.3852 | 0.0954       | 1.2643 | -0.0945 | 0.0009  |
|               | Lu-O <sub>carb</sub>                 | (3,-1)   | 0.0754           | 0.3851 | 0.0954       | 1.2644 | -0.0944 | 0.0009  |
|               | Lu-(O <sub>carb</sub> ) <sub>2</sub> | (3,+1)   | 0.0408           | 0.2427 | 0.0576       | 1.4112 | -0.0544 | 0.0031  |
| LuCar3_2bi1mo |                                      |          |                  |        |              |        |         |         |
|               | Type                                 | $\rho_b$ | $\nabla^2\rho_b$ | $G_b$  | $G_b/\rho_b$ | $V_b$  | $E^e_b$ |         |
|               | Lu-O <sub>carb</sub>                 | (3,-1)   | 0.0923           | 0.5851 | 0.1437       | 1.5572 | -0.1411 | 0.0026  |
|               | Lu-O <sub>carb</sub>                 | (3,-1)   | 0.0684           | 0.3484 | 0.0844       | 1.2336 | -0.0817 | 0.0027  |
|               | Lu-O <sub>carb</sub>                 | (3,-1)   | 0.0685           | 0.3489 | 0.0845       | 1.2339 | -0.0818 | 0.0027  |
|               | Lu-O <sub>carb</sub>                 | (3,-1)   | 0.0685           | 0.3487 | 0.0845       | 1.2337 | -0.0817 | 0.0027  |
|               | Lu-O <sub>carb</sub>                 | (3,-1)   | 0.0684           | 0.3485 | 0.0844       | 1.2337 | -0.0817 | 0.0027  |
|               | Lu-(O <sub>carb</sub> ) <sub>2</sub> | (3,+1)   | 0.0383           | 0.2242 | 0.0526       | 1.3726 | -0.0491 | 0.0035  |
|               | Lu-(O <sub>carb</sub> ) <sub>2</sub> | (3,+1)   | 0.0383           | 0.2242 | 0.0526       | 1.3727 | -0.0491 | 0.0035  |
| LuCar3_3bi0mo |                                      |          |                  |        |              |        |         |         |
|               | Type                                 | $\rho_b$ | $\nabla^2\rho_b$ | $G_b$  | $G_b/\rho_b$ | $V_b$  | $E^e_b$ |         |
|               | Lu-O <sub>carb</sub>                 | (3,-1)   | 0.0638           | 0.3193 | 0.0771       | 1.2089 | -0.0744 | 0.0027  |
|               | Lu-O <sub>carb</sub>                 | (3,-1)   | 0.0638           | 0.3189 | 0.0771       | 1.2086 | -0.0744 | 0.0027  |
|               | Lu-O <sub>carb</sub>                 | (3,-1)   | 0.0638           | 0.3242 | 0.0771       | 1.2088 | -0.0732 | 0.0040  |
|               | Lu-O <sub>carb</sub>                 | (3,-1)   | 0.0637           | 0.3246 | 0.0771       | 1.2088 | -0.0729 | 0.0041  |
|               | Lu-O <sub>carb</sub>                 | (3,-1)   | 0.0638           | 0.3248 | 0.0771       | 1.2089 | -0.0730 | 0.0041  |
|               | Lu-O <sub>carb</sub>                 | (3,-1)   | 0.0638           | 0.3240 | 0.0771       | 1.2088 | -0.0731 | 0.0039  |
|               | Lu-(O <sub>carb</sub> ) <sub>2</sub> | (3,+1)   | 0.0365           | 0.2140 | 0.0490       | 1.3418 | -0.0444 | 0.0046  |
|               | Lu-(O <sub>carb</sub> ) <sub>2</sub> | (3,+1)   | 0.0365           | 0.2134 | 0.0490       | 1.3421 | -0.0446 | 0.0044  |
|               | Lu-(O <sub>carb</sub> ) <sub>2</sub> | (3,+1)   | 0.0365           | 0.2049 | 0.0490       | 1.3421 | -0.0467 | 0.0023  |

**Table S11.** Topological analysis of the electron density of Lu species with 4 carbonate ligands. Gas phase calculations.

| LuCar4_0bi4mo |                                      |          |                  |        |              |        |         |         |
|---------------|--------------------------------------|----------|------------------|--------|--------------|--------|---------|---------|
|               | Type                                 | $\rho_b$ | $\nabla^2\rho_b$ | $G_b$  | $G_b/\rho_b$ | $V_b$  | $E^e_b$ |         |
|               | Lu-O <sub>carb</sub>                 | (3,-1)   | 0.0759           | 0.4778 | 0.1115       | 1.4692 | -0.1036 | 0.0079  |
|               | Lu-O <sub>carb</sub>                 | (3,-1)   | 0.0758           | 0.4779 | 0.1115       | 1.4704 | -0.1035 | 0.0080  |
|               | Lu-O <sub>carb</sub>                 | (3,-1)   | 0.0758           | 0.4767 | 0.1113       | 1.4687 | -0.1034 | 0.0079  |
|               | Lu-O <sub>carb</sub>                 | (3,-1)   | 0.0758           | 0.4770 | 0.1113       | 1.4685 | -0.1033 | 0.0080  |
| LuCar4_1bi3mo |                                      |          |                  |        |              |        |         |         |
|               | Type                                 | $\rho_b$ | $\nabla^2\rho_b$ | $G_b$  | $G_b/\rho_b$ | $V_b$  | $E^e_b$ |         |
|               | Lu-O <sub>carb</sub>                 | (3,-1)   | 0.0682           | 0.4202 | 0.0974       | 1.4279 | -0.0898 | 0.0076  |
|               | Lu-O <sub>carb</sub>                 | (3,-1)   | 0.0606           | 0.2079 | 0.0722       | 1.1914 | -0.0923 | -0.0202 |
|               | Lu-O <sub>carb</sub>                 | (3,-1)   | 0.0449           | 0.2257 | 0.0509       | 1.1343 | -0.0455 | 0.0055  |
|               | Lu-O <sub>carb</sub>                 | (3,-1)   | 0.0705           | 0.4470 | 0.1019       | 1.4454 | -0.0921 | 0.0098  |
|               | Lu-O <sub>carb</sub>                 | (3,-1)   | 0.0705           | 0.4472 | 0.1019       | 1.4456 | -0.0920 | 0.0099  |
|               | Lu-(O <sub>carb</sub> ) <sub>2</sub> | (3,+1)   | 0.0319           | 0.1724 | 0.0401       | 1.2586 | -0.0371 | 0.0030  |
| LuCar4_2bi2mo |                                      |          |                  |        |              |        |         |         |
|               | Type                                 | $\rho_b$ | $\nabla^2\rho_b$ | $G_b$  | $G_b/\rho_b$ | $V_b$  | $E^e_b$ |         |
|               | Lu-O <sub>carb</sub>                 | (3,-1)   | 0.0631           | 0.3743 | 0.0885       | 1.4020 | -0.0834 | 0.0051  |
|               | Lu-O <sub>carb</sub>                 | (3,-1)   | 0.0436           | 0.2071 | 0.0488       | 1.1194 | -0.0458 | 0.0030  |
|               | Lu-O <sub>carb</sub>                 | (3,-1)   | 0.0556           | 0.2348 | 0.0643       | 1.1571 | -0.0699 | -0.0056 |
|               | Lu-O <sub>carb</sub>                 | (3,-1)   | 0.0631           | 0.3743 | 0.0885       | 1.4020 | -0.0834 | 0.0051  |
|               | Lu-O <sub>carb</sub>                 | (3,-1)   | 0.0436           | 0.2071 | 0.0488       | 1.1194 | -0.0457 | 0.0030  |
|               | Lu-O <sub>carb</sub>                 | (3,-1)   | 0.0556           | 0.2348 | 0.0643       | 1.1569 | -0.0699 | -0.0056 |
|               | Lu-(O <sub>carb</sub> ) <sub>2</sub> | (3,+1)   | 0.0304           | 0.1696 | 0.0377       | 1.2411 | -0.0331 | 0.0047  |
|               | Lu-(O <sub>carb</sub> ) <sub>2</sub> | (3,+1)   | 0.0304           | 0.1696 | 0.0377       | 1.2408 | -0.0330 | 0.0047  |
| LuCar4_3bilmo |                                      |          |                  |        |              |        |         |         |
|               | Type                                 | $\rho_b$ | $\nabla^2\rho_b$ | $G_b$  | $G_b/\rho_b$ | $V_b$  | $E^e_b$ |         |
|               | Lu-O <sub>carb</sub>                 | (3,-1)   | 0.0381           | 0.1817 | 0.0409       | 1.0730 | -0.0364 | 0.0045  |
|               | Lu-O <sub>carb</sub>                 | (3,-1)   | 0.0502           | 0.2330 | 0.0565       | 1.1257 | -0.0548 | 0.0017  |
|               | Lu-O <sub>carb</sub>                 | (3,-1)   | 0.0451           | 0.2196 | 0.0502       | 1.1145 | -0.0455 | 0.0047  |
|               | Lu-O <sub>carb</sub>                 | (3,-1)   | 0.0381           | 0.1817 | 0.0409       | 1.0729 | -0.0364 | 0.0045  |
|               | Lu-O <sub>carb</sub>                 | (3,-1)   | 0.0574           | 0.3557 | 0.0788       | 1.3710 | -0.0686 | 0.0102  |
|               | Lu-O <sub>carb</sub>                 | (3,-1)   | 0.0484           | 0.2097 | 0.0542       | 1.1200 | -0.0560 | -0.0018 |
|               | Lu-O <sub>carb</sub>                 | (3,-1)   | 0.0502           | 0.2330 | 0.0565       | 1.1257 | -0.0548 | 0.0017  |
|               | Lu-(O <sub>carb</sub> ) <sub>2</sub> | (3,+1)   | 0.0279           | 0.1513 | 0.0334       | 1.1948 | -0.0289 | 0.0045  |
|               | Lu-(O <sub>carb</sub> ) <sub>2</sub> | (3,+1)   | 0.0279           | 0.1512 | 0.0334       | 1.1948 | -0.0289 | 0.0045  |
|               | Lu-(O <sub>carb</sub> ) <sub>2</sub> | (3,+1)   | 0.0292           | 0.1619 | 0.0360       | 1.2299 | -0.0314 | 0.0045  |



| LuCar4_4bi0mo                        |        |          |                  |        |              |         |         |
|--------------------------------------|--------|----------|------------------|--------|--------------|---------|---------|
|                                      | Type   | $\rho_b$ | $\nabla^2\rho_b$ | $G_b$  | $G_b/\rho_b$ | $V_b$   | $E_b^e$ |
| Lu-O <sub>carb</sub>                 | (3,-1) | 0.0424   | 0.2025           | 0.0459 | 1.0838       | -0.0412 | 0.0047  |
| Lu-O <sub>carb</sub>                 | (3,-1) | 0.0392   | 0.1775           | 0.0418 | 1.0661       | -0.0392 | 0.0026  |
| Lu-O <sub>carb</sub>                 | (3,-1) | 0.0392   | 0.1775           | 0.0418 | 1.0658       | -0.0392 | 0.0026  |
| Lu-O <sub>carb</sub>                 | (3,-1) | 0.0422   | 0.2018           | 0.0457 | 1.0831       | -0.0410 | 0.0047  |
| Lu-O <sub>carb</sub>                 | (3,-1) | 0.0422   | 0.2016           | 0.0457 | 1.0830       | -0.0410 | 0.0047  |
| Lu-O <sub>carb</sub>                 | (3,-1) | 0.0392   | 0.1776           | 0.0418 | 1.0661       | -0.0392 | 0.0026  |
| Lu-O <sub>carb</sub>                 | (3,-1) | 0.0390   | 0.1767           | 0.0416 | 1.0651       | -0.0389 | 0.0026  |
| Lu-O <sub>carb</sub>                 | (3,-1) | 0.0422   | 0.2018           | 0.0457 | 1.0829       | -0.0410 | 0.0047  |
| Lu-(O <sub>carb</sub> ) <sub>2</sub> | (3,+1) | 0.0266   | 0.1383           | 0.0312 | 1.1722       | -0.0278 | 0.0034  |
| Lu-(O <sub>carb</sub> ) <sub>2</sub> | (3,+1) | 0.0266   | 0.1381           | 0.0311 | 1.1716       | -0.0277 | 0.0034  |
| Lu-(O <sub>carb</sub> ) <sub>2</sub> | (3,+1) | 0.0266   | 0.1381           | 0.0311 | 1.1716       | -0.0277 | 0.0034  |
| Lu-(O <sub>carb</sub> ) <sub>2</sub> | (3,+1) | 0.0265   | 0.1378           | 0.0311 | 1.1711       | -0.0277 | 0.0034  |

**Table S12.** Cartesian coordinates of La species with 3 carbonate ligands.

| LaCar3_0bi3mo |           |           |           |
|---------------|-----------|-----------|-----------|
| La            | -0.001100 | -0.001317 | -0.003841 |
| C             | 0.979727  | 3.460611  | 0.003216  |
| O             | 0.598942  | 2.120032  | -0.019993 |
| O             | -2.138067 | -0.541039 | 0.000191  |
| C             | -3.488988 | -0.882287 | 0.002871  |
| O             | -4.029372 | -1.017313 | 1.140121  |
| O             | 1.534870  | -1.582998 | -0.039540 |
| C             | 2.511531  | -2.575103 | 0.003984  |
| O             | 2.929735  | -2.999922 | -1.113025 |
| O             | 1.133407  | 4.018540  | -1.122739 |
| O             | 1.131726  | 3.978245  | 1.148888  |
| O             | -4.033327 | -1.021122 | -1.131908 |
| O             | 2.878225  | -2.947456 | 1.157820  |

| LaCar3_1bi2mo |           |           |           |
|---------------|-----------|-----------|-----------|
| La            | -0.000008 | 0.142728  | -0.000170 |
| C             | -3.136147 | -1.645988 | 0.000316  |
| O             | -3.630973 | -1.921231 | 1.136948  |
| O             | -3.635757 | -1.925052 | -1.133273 |
| O             | -1.927668 | -0.969971 | -0.003309 |
| O             | 0.001160  | 2.283239  | -1.116700 |
| C             | 0.000883  | 3.011529  | -0.000064 |
| O             | 0.000127  | 2.283125  | 1.116595  |
| O             | 1.927113  | -0.970722 | 0.003121  |
| C             | 3.135285  | -1.647303 | 0.000088  |
| O             | 3.629700  | -1.924258 | -1.136323 |
| O             | 3.635051  | -1.925137 | 1.133887  |
| O             | 0.001290  | 4.264391  | 0.000010  |

| LaCar3_2bi1mo |           |           |           |
|---------------|-----------|-----------|-----------|
| La            | 0.152569  | -0.000095 | 0.000359  |
| C             | -3.470357 | -0.012056 | -0.000357 |
| C             | 1.597478  | -2.515003 | -0.000306 |
| C             | 1.573539  | 2.527740  | 0.000293  |
| O             | -4.042988 | -0.015288 | 1.136622  |
| O             | -2.092720 | -0.012015 | -0.006612 |
| O             | -4.053353 | -0.009669 | -1.132067 |
| O             | 2.233334  | -3.600764 | -0.001370 |
| O             | 1.230775  | -1.890853 | 1.114971  |
| O             | 1.234375  | -1.887309 | -1.114875 |
| O             | 2.199971  | 3.618833  | 0.000186  |
| O             | 1.215358  | 1.897674  | -1.114429 |
| O             | 1.212701  | 1.899554  | 1.115297  |

| LaCar3_3bi0mo |           |           |           |
|---------------|-----------|-----------|-----------|
| La            | -0.000012 | -0.000657 | -0.000988 |
| C             | -0.026028 | 2.928162  | 0.001077  |
| C             | -2.524303 | -1.485849 | -0.000184 |

|   |           |           |           |
|---|-----------|-----------|-----------|
| C | 2.550304  | -1.441060 | 0.001157  |
| O | -0.035387 | 4.191379  | 0.001967  |
| O | -0.015864 | 2.207972  | -1.113003 |
| O | -0.025084 | 2.206473  | 1.114245  |
| O | -3.614594 | -2.123842 | -0.000995 |
| O | -1.902533 | -1.122054 | 1.113570  |
| O | -1.901802 | -1.120938 | -1.113697 |
| O | 3.650856  | -2.061203 | 0.001922  |
| O | 1.919973  | -1.089748 | 1.114375  |
| O | 1.924542  | -1.084294 | -1.112883 |

**Table S13.** Cartesian coordinates of La species with 4 carbonate ligands.

| LaCar4_0bi4mo |           |           |           |
|---------------|-----------|-----------|-----------|
| La            | -0.000516 | 0.001711  | -0.001189 |
| C             | -2.737083 | 1.587003  | -1.917339 |
| O             | -1.717417 | 0.996100  | -1.249069 |
| O             | 1.014107  | 1.723451  | 1.224435  |
| C             | 1.618883  | 2.713283  | 1.924308  |
| O             | 2.162596  | 3.678652  | 1.270950  |
| O             | -0.978470 | -1.690898 | 1.292244  |
| C             | -1.569258 | -2.706786 | 1.966980  |
| O             | -1.551502 | -2.679002 | 3.253318  |
| O             | -3.680217 | 2.133616  | -1.235314 |
| O             | -2.714918 | 1.575127  | -3.203709 |
| O             | 1.621441  | 2.643984  | 3.208423  |
| O             | -2.119970 | -3.651754 | 1.291322  |
| C             | 2.688305  | -1.598709 | -1.970501 |
| O             | 3.640823  | -2.143159 | -1.300148 |
| O             | 2.645081  | -1.595303 | -3.256530 |
| O             | 1.681485  | -0.999096 | -1.290039 |

| LaCar4_1bi3mo |           |           |           |
|---------------|-----------|-----------|-----------|
| La            | -0.000135 | -0.076341 | 0.105193  |
| C             | 0.002912  | 3.644753  | 0.423309  |
| O             | 0.004810  | 4.372127  | -0.642357 |
| O             | 0.002402  | 4.155648  | 1.609172  |
| O             | 0.001420  | 2.303856  | 0.292373  |
| O             | -0.000049 | -0.498080 | 2.586750  |
| C             | -0.001413 | -1.820751 | 2.562614  |
| O             | -0.002239 | -2.354237 | 1.366980  |
| C             | -3.222823 | -0.842133 | -1.590620 |
| O             | 2.037951  | -0.540895 | -1.023739 |
| C             | 3.221589  | -0.846695 | -1.590434 |
| O             | 4.298727  | -0.698075 | -0.896665 |
| O             | 3.233927  | -1.276664 | -2.807264 |
| O             | -0.001873 | -2.519166 | 3.639884  |
| O             | -3.235596 | -1.273526 | -2.806954 |
| O             | -4.299863 | -0.691092 | -0.897224 |
| O             | -2.038853 | -0.537343 | -1.024106 |

| LaCar4_2bi2mo |           |           |           |
|---------------|-----------|-----------|-----------|
| La            | 0.000001  | -0.160829 | 0.000000  |
| C             | 2.817815  | 2.179798  | -0.873384 |
| C             | 1.306908  | -2.035161 | 2.001710  |
| C             | -2.817850 | 2.179759  | 0.873376  |
| C             | -1.306871 | -2.035192 | -2.001702 |
| O             | 3.181985  | 2.281684  | -2.111987 |
| O             | 1.792504  | 1.375861  | -0.558116 |
| O             | 3.416819  | 2.834123  | 0.069155  |
| O             | 1.810255  | -2.834708 | 2.878354  |

|   |           |           |           |
|---|-----------|-----------|-----------|
| O | 1.650518  | -2.063747 | 0.739309  |
| O | 0.403442  | -1.128607 | 2.323814  |
| O | -3.182003 | 2.281678  | 2.111981  |
| O | -1.792549 | 1.375807  | 0.558115  |
| O | -3.416868 | 2.834056  | -0.069173 |
| O | -1.810208 | -2.834747 | -2.878344 |
| O | -1.650479 | -2.063779 | -0.739301 |
| O | -0.403427 | -1.128617 | -2.323812 |

LaCar4\_3bi1mo

|    |           |           |           |
|----|-----------|-----------|-----------|
| La | 0.129567  | 0.000093  | -0.047544 |
| C  | 0.360783  | 2.791950  | -1.344692 |
| C  | 2.571382  | 0.001500  | 1.797404  |
| C  | -3.534530 | -0.003657 | 0.987575  |
| C  | 0.367471  | -2.789979 | -1.345563 |
| O  | 0.494164  | 3.936170  | -1.937119 |
| O  | 0.238037  | 2.682321  | -0.048804 |
| O  | 0.343035  | 1.662273  | -2.020518 |
| O  | 3.589399  | 0.001790  | 2.596200  |
| O  | 2.705320  | 0.001737  | 0.494378  |
| O  | 1.335954  | 0.000768  | 2.246735  |
| O  | 0.503830  | -3.933944 | -1.937628 |
| O  | 0.351300  | -1.660202 | -2.021205 |
| O  | 0.239945  | -2.680551 | -0.050048 |
| O  | -3.829551 | -0.001028 | 2.252554  |
| O  | -4.464190 | -0.007738 | 0.080773  |
| O  | -2.254234 | -0.002123 | 0.612388  |

LaCar4\_4bi0mo

|    |           |           |           |
|----|-----------|-----------|-----------|
| La | 0.000129  | 0.000048  | -0.000078 |
| C  | -0.860512 | 2.705671  | 1.298532  |
| C  | -2.706065 | -0.860585 | -1.298130 |
| C  | 2.705597  | 0.860430  | -1.298730 |
| C  | 0.860755  | -2.705600 | 1.298421  |
| O  | -1.214694 | 3.819488  | 1.869597  |
| O  | -0.524606 | 1.648749  | 1.998381  |
| O  | -0.818600 | 2.574546  | -0.001613 |
| O  | -3.820172 | -1.215100 | -1.868493 |
| O  | -2.574293 | -0.818486 | 0.001936  |
| O  | -1.649632 | -0.524602 | -1.998580 |
| O  | 3.819696  | 1.215096  | -1.868894 |
| O  | 1.649023  | 0.524946  | -1.999210 |
| O  | 2.573870  | 0.817685  | 0.001398  |
| O  | 1.215275  | -3.819491 | 1.869124  |
| O  | 0.817819  | -2.574425 | -0.001700 |
| O  | 0.525566  | -1.648688 | 1.998542  |

**Table S14.** Cartesian coordinates of Lu species with 3 carbonate ligands.

| LuCar3_0bi3mo |           |           |           |
|---------------|-----------|-----------|-----------|
| Lu            | -0.001930 | -0.000284 | -0.004052 |
| C             | 1.651621  | 2.986134  | 0.003740  |
| O             | 0.976815  | 1.769458  | -0.013888 |
| O             | -2.023685 | -0.040078 | 0.000987  |
| C             | -3.414778 | -0.067458 | 0.004455  |
| O             | -3.968437 | -0.083533 | 1.141734  |
| O             | 1.038031  | -1.734357 | -0.032766 |
| C             | 1.768606  | -2.917582 | 0.004129  |
| O             | 2.070188  | -3.422027 | -1.116047 |
| O             | 1.926123  | 3.487275  | -1.124895 |
| O             | 1.916811  | 3.458692  | 1.146775  |
| O             | -3.974449 | -0.073021 | -1.130045 |
| O             | 2.051643  | -3.360710 | 1.154862  |

| LuCar3_1bi2mo |           |           |           |
|---------------|-----------|-----------|-----------|
| Lu            | 0.000013  | 0.137072  | -0.000071 |
| C             | 2.978452  | -1.550138 | 0.000150  |
| O             | 3.479734  | -1.820360 | -1.134287 |
| O             | 3.478095  | -1.821094 | 1.135109  |
| O             | 1.764282  | -0.891236 | -0.000516 |
| O             | -0.000642 | 2.038013  | 1.115016  |
| C             | -0.001279 | 2.774464  | 0.000041  |
| O             | -0.001109 | 2.038204  | -1.115014 |
| O             | -1.763191 | -0.892883 | 0.000409  |
| C             | -2.977304 | -1.551947 | -0.000006 |
| O             | -3.478388 | -1.822100 | 1.134502  |
| O             | -3.476986 | -1.823190 | -1.134891 |
| O             | -0.001813 | 4.023851  | 0.000166  |

| LuCar3_2bi1mo |           |           |           |
|---------------|-----------|-----------|-----------|
| Lu            | 0.156156  | -0.000009 | -0.000177 |
| C             | -3.273410 | -0.000620 | 0.000088  |
| C             | 1.448960  | -2.349499 | 0.000136  |
| C             | 1.447890  | 2.350143  | 0.000312  |
| O             | -3.850131 | -0.000918 | 1.134521  |
| O             | -1.898956 | -0.000944 | -0.001477 |
| O             | -3.852677 | -0.000018 | -1.133054 |
| O             | 2.064505  | -3.444802 | -0.000029 |
| O             | 1.092634  | -1.709672 | 1.111023  |
| O             | 1.093723  | -1.708827 | -1.110657 |
| O             | 2.062824  | 3.445759  | 0.000397  |
| O             | 1.092531  | 1.709719  | -1.110664 |
| O             | 1.092080  | 1.709764  | 1.111107  |

| LuCar3_3bi0mo |           |           |           |
|---------------|-----------|-----------|-----------|
| Lu            | -0.000078 | -0.000073 | -0.000304 |
| C             | 1.908346  | -1.927427 | 0.000378  |

|   |           |           |           |
|---|-----------|-----------|-----------|
| C | 0.715519  | 2.616212  | 0.000161  |
| C | -2.623655 | -0.688536 | 0.000203  |
| O | 2.796554  | -2.824036 | 0.000465  |
| O | 1.184344  | -1.618906 | -1.067994 |
| O | 1.606455  | -1.200415 | 1.068503  |
| O | 1.048386  | 3.833488  | 0.000576  |
| O | 0.236100  | 1.991281  | 1.068208  |
| O | 0.810330  | 1.834896  | -1.068159 |
| O | -3.844336 | -1.008925 | 0.000479  |
| O | -1.843038 | -0.790603 | 1.068360  |
| O | -1.994263 | -0.216320 | -1.068298 |

**Table S15.** Cartesian coordinates of Lu species with 4 carbonate ligands.

| LuCar4_0bi4mo |           |           |           |
|---------------|-----------|-----------|-----------|
| Lu            | 0.000082  | 0.001010  | -0.001717 |
| C             | -2.625237 | 1.369378  | -1.834030 |
| O             | -1.583798 | 0.823944  | -1.167803 |
| O             | 0.842602  | 1.592058  | 1.140685  |
| C             | 1.385798  | 2.632549  | 1.810298  |
| O             | 1.903195  | 3.594595  | 1.132079  |
| O             | -0.835284 | -1.571674 | 1.171906  |
| C             | -1.387737 | -2.608409 | 1.839732  |
| O             | -1.391714 | -2.576913 | 3.126040  |
| O             | -3.578970 | 1.898023  | -1.153166 |
| O             | -2.617003 | 1.333938  | -3.120199 |
| O             | 1.360571  | 2.614600  | 3.096339  |
| O             | -1.884820 | -3.579897 | 1.160293  |
| C             | 2.627046  | -1.395028 | -1.811507 |
| O             | 3.580095  | -1.913951 | -1.121544 |
| O             | 2.620729  | -1.380773 | -3.097915 |
| O             | 1.583764  | -0.841781 | -1.154845 |

| LuCar4_1bi3mo |           |           |           |
|---------------|-----------|-----------|-----------|
| Lu            | -0.000711 | -0.074706 | 0.099650  |
| C             | 0.023605  | 3.424926  | 0.445484  |
| O             | 0.026493  | 4.177685  | -0.603522 |
| O             | 0.029834  | 3.913107  | 1.641900  |
| O             | 0.013676  | 2.092305  | 0.285759  |
| O             | -0.006575 | -0.460505 | 2.361905  |
| C             | -0.014010 | -1.784515 | 2.311559  |
| O             | -0.014723 | -2.274211 | 1.101657  |
| C             | -3.050312 | -0.721827 | -1.493363 |
| O             | 1.856506  | -0.466127 | -0.932989 |
| C             | 3.042268  | -0.758718 | -1.491072 |
| O             | 4.110007  | -0.655733 | -0.773830 |
| O             | 3.073159  | -1.132065 | -2.726556 |
| O             | -0.019852 | -2.507580 | 3.372479  |
| O             | -3.086050 | -1.098115 | -2.727866 |
| O             | -4.116451 | -0.604028 | -0.776147 |
| O             | -1.860879 | -0.441614 | -0.936640 |

| LuCar4_2bi2mo |           |           |           |
|---------------|-----------|-----------|-----------|
| Lu            | -0.000022 | -0.150943 | 0.000002  |
| C             | 2.632697  | 2.063162  | -0.833902 |
| C             | 1.297667  | -1.897545 | 1.786799  |
| C             | -2.632571 | 2.063416  | 0.833723  |
| C             | -1.297747 | -1.897776 | -1.786599 |
| O             | 2.964453  | 2.189840  | -2.080272 |
| O             | 1.614504  | 1.263355  | -0.506441 |
| O             | 3.264772  | 2.696097  | 0.103152  |
| O             | 1.832719  | -2.696767 | 2.646122  |



O 1.570911 -1.932778 0.510446  
O 0.422300 -0.974214 2.138004  
O -2.963960 2.190121 2.080175  
O -1.614581 1.263493 0.505912  
O -3.264783 2.696498 -0.103155  
O -1.832838 -2.697098 -2.645812  
O -1.571055 -1.932780 -0.510251  
O -0.422285 -0.974589 -2.137916

LuCar4\_3bi1mo

Lu 0.123192 0.000045 -0.052615  
C 0.289875 2.635065 -1.171953  
C 2.457377 -0.000120 1.553795  
C -3.313989 -0.000496 0.920848  
C 0.289928 -2.634756 -1.172266  
O 0.401769 3.795857 -1.740641  
O 0.231336 2.479665 0.120484  
O 0.229456 1.521244 -1.868854  
O 3.515719 -0.000012 2.302236  
O 2.520723 0.000050 0.245721  
O 1.245202 -0.000108 2.052632  
O 0.403150 -3.795375 -1.741016  
O 0.230703 -1.520763 -1.869010  
O 0.231159 -2.479503 0.120186  
O -3.611744 -0.000157 2.185908  
O -4.245539 -0.001198 0.014683  
O -2.037654 0.000132 0.546812

LuCar4\_4bi0mo

Lu -0.000070 -0.000094 -0.000025  
C 1.922144 1.850768 1.125516  
C -1.851275 1.923250 -1.125210  
C 1.853473 -1.921325 -1.125060  
C -1.924035 -1.852315 1.124770  
O 2.781671 2.678205 1.650057  
O 1.141859 1.099200 1.856454  
O 1.780660 1.714396 -0.166320  
O -2.677638 2.784409 -1.648822  
O -1.710862 1.784107 0.166403  
O -1.102887 1.140731 -1.857006  
O 2.681543 -2.781047 -1.648339  
O 1.098009 -1.145902 -1.857105  
O 1.717881 -1.777096 0.166525  
O -2.783783 -2.679809 1.649070  
O -1.782129 -1.715743 -0.166869  
O -1.143930 -1.100902 1.856156

**Table S16.** Second-order perturbative estimates of donor-acceptor interactions in the NBO basis between carbonates and Ln(III). We specify the character of the acceptor orbital, while for the donor it always correspond to oxygen lone pair. Only energies above 10 kcal mol<sup>-1</sup> are reported.

| donor → acceptor                                                                                     | Character of empty Ln orbital | E(2) / kcal mol <sup>-1</sup> |
|------------------------------------------------------------------------------------------------------|-------------------------------|-------------------------------|
| [La(η <sup>1</sup> -CO <sub>3</sub> ) <sub>2</sub> (η <sup>2</sup> -CO <sub>3</sub> )] <sup>3-</sup> |                               |                               |
| O8 (η <sup>2</sup> ) → La                                                                            | d (86%)                       | 26.05                         |
| O6 (η <sup>2</sup> ) → La                                                                            | d (86%)                       | 25.62                         |
| O5 (η <sup>1</sup> ) → La                                                                            | s (35%), d (34%), f (34%)     | 24.34                         |
| O9 (η <sup>1</sup> ) → La                                                                            | s (35%), d (34%), f (34%)     | 24.34                         |
| O5 (η <sup>1</sup> ) → La                                                                            | d (96%)                       | 24.07                         |
| O9 (η <sup>1</sup> ) → La                                                                            | d (96%)                       | 23.76                         |
| O9 (η <sup>1</sup> ) → La                                                                            | d (94%)                       | 14.80                         |
| O5 (η <sup>1</sup> ) → La                                                                            | d (94%)                       | 14.78                         |
| O9 (η <sup>1</sup> ) → La                                                                            | d (99%)                       | 14.72                         |
| O5 (η <sup>1</sup> ) → La                                                                            | d (99%)                       | 14.36                         |
| [Lu(η <sup>1</sup> -CO <sub>3</sub> ) <sub>2</sub> (η <sup>2</sup> -CO <sub>3</sub> )] <sup>3-</sup> |                               |                               |
| O9 (η <sup>1</sup> ) → Lu                                                                            | s (90%)                       | 24.28                         |
| O5 (η <sup>1</sup> ) → Lu                                                                            | s (90%)                       | 24.27                         |
| O8 (η <sup>2</sup> ) → Lu                                                                            | d (100%)                      | 23.05                         |
| O6 (η <sup>2</sup> ) → Lu                                                                            | d (100%)                      | 22.99                         |
| O5 (η <sup>1</sup> ) → Lu                                                                            | d (100%)                      | 22.55                         |
| O9 (η <sup>1</sup> ) → Lu                                                                            | d (100%)                      | 22.39                         |
| O5 (η <sup>1</sup> ) → Lu                                                                            | d (100%)                      | 14.28                         |
| O9 (η <sup>1</sup> ) → Lu                                                                            | d (100%)                      | 14.27                         |
| O5 (η <sup>1</sup> ) → Lu                                                                            | d (100%)                      | 12.84                         |
| O9 (η <sup>1</sup> ) → Lu                                                                            | d (100%)                      | 12.80                         |
| O9 (η <sup>1</sup> ) → Lu                                                                            | d (100%)                      | 12.32                         |
| O5 (η <sup>1</sup> ) → Lu                                                                            | d (100%)                      | 12.17                         |
| O6 (η <sup>2</sup> ) → Lu                                                                            | s (90%)                       | 10.47                         |
| O8 (η <sup>2</sup> ) → Lu                                                                            | s (90%)                       | 10.47                         |
| [La(η <sup>1</sup> -CO <sub>3</sub> ) <sub>3</sub> (η <sup>2</sup> -CO <sub>3</sub> )] <sup>5-</sup> |                               |                               |
| O6 (η <sup>2</sup> ) → La                                                                            | d (96%)                       | 22.65                         |
| O5 (η <sup>1</sup> ) → La                                                                            | d (96%)                       | 21.37                         |
| O10 (η <sup>1</sup> ) → La                                                                           | d (77%), f (22%)              | 16.64                         |
| O17 (η <sup>1</sup> ) → La                                                                           | d (77%), f (22%)              | 16.57                         |
| O10 (η <sup>1</sup> ) → La                                                                           | s (77%), f (23%)              | 16.28                         |
| O17 (η <sup>1</sup> ) → La                                                                           | s (77%), f (23%)              | 16.25                         |
| O8 (η <sup>2</sup> ) → La                                                                            | d (96%)                       | 15.36                         |
| O17 (η <sup>1</sup> ) → La                                                                           | d (96%)                       | 14.44                         |
| O10 (η <sup>1</sup> ) → La                                                                           | d (96%)                       | 14.30                         |
| O8 (η <sup>2</sup> ) → La                                                                            | d (96%)                       | 11.68                         |
| O5 (η <sup>1</sup> ) → La                                                                            | s (77%), f (23%)              | 11.47                         |
| [Lu(η <sup>1</sup> -CO <sub>3</sub> ) <sub>3</sub> (η <sup>2</sup> -CO <sub>3</sub> )] <sup>5-</sup> |                               |                               |
| O5 (η <sup>1</sup> ) → Lu                                                                            | d (84%)                       | 36.35                         |
| O8 (η <sup>2</sup> ) → Lu                                                                            | d (84%)                       | 25.96                         |

|                                   |                  |       |
|-----------------------------------|------------------|-------|
| O6 ( $\eta^2$ ) $\rightarrow$ Lu  | s (52%), d (48%) | 23.80 |
| O10 ( $\eta^1$ ) $\rightarrow$ Lu | s (52%), d (48%) | 19.34 |
| O10 ( $\eta^1$ ) $\rightarrow$ Lu | d (69%), s (31%) | 13.94 |
| O10 ( $\eta^1$ ) $\rightarrow$ Lu | d (94%)          | 13.92 |
| O17 ( $\eta^1$ ) $\rightarrow$ Lu | d (94%)          | 13.60 |
| O5 ( $\eta^1$ ) $\rightarrow$ Lu  | d (69%), s (31%) | 13.22 |

**Table S17.** Relative energy obtained with different functionals with B3LYP optimized geometries (fixed) and optimizing the geometry with the given functional. Energies are in kcal/mol.

| LaC <sub>4</sub> | B3LYP     | BLYP               |           | M05                |           | M05-2X             |           | VSXC               |           |
|------------------|-----------|--------------------|-----------|--------------------|-----------|--------------------|-----------|--------------------|-----------|
|                  | optimised | fixed <sup>a</sup> | optimised |
| 4m               | 0.00      | 0.00               | 0.00      | 0.00               | 0.00      | 0.00               | 0.00      | 7.10               | 8.03      |
| 3m1b             | 2.83      | 3.88               | 3.90      | 1.63               | 1.64      | 0.04               | 0.01      | 3.89               | 4.73      |
| 2m2b             | 6.93      | 8.95               | 8.98      | 4.50               | 4.53      | 1.45               | 1.36      | 1.26               | 1.32      |
| 1m3b             | 14.53     | 17.41              | 17.42     | 10.78              | 10.84     | 6.37               | 6.16      | 0.00               | 0.00      |
| 4b               | 23.86     | 27.41              | 27.40     | 18.75              | 18.82     | 13.54              | 13.21     | 0.77               | 1.39      |

| LaC <sub>3</sub> | B3LYP | fixed <sup>a</sup> | optimised |
|------------------|-------|--------------------|-----------|--------------------|-----------|--------------------|-----------|--------------------|-----------|
|                  | 3m    | 43.82              | 37.90     | 37.85              | 45.99     | 46.07              | 54.69     | 54.74              | 54.27     |
| 2m1b             | 24.60 | 21.01              | 20.97     | 26.32              | 26.33     | 31.42              | 31.49     | 32.30              | 32.18     |
| 1m2b             | 10.22 | 8.58               | 8.57      | 11.20              | 11.20     | 13.51              | 13.54     | 14.38              | 14.27     |
| 3b               | 0.00  | 0.00               | 0.00      | 0.00               | 0.00      | 0.00               | 0.00      | 0.00               | 0.00      |

<sup>a</sup>fixed to B3LYP geometry
